# Supplementary material for: Novel liquid biopsy CNV biomarkers in malignant melanoma
Source: PubMed Central journal article supplement (PMC11233564; doi:10.1038/s41598-024-65928-y), 2024-07-09
Supplement: 41598_2024_65928_MOESM1_ESM.pdf [file 41598_2024_65928_MOESM1_ESM.pdf]

# report\_CDKN2A\_\_Oct9\_2023.R

mg

2023-10-09

```
#  
#  
# Oct 9 2023 Mo -- CDKN2A  
# Oct 5 2023 Th -- triplot; spaghetti; lin mixed model - dg, outlier,  
#                   emmeans, custom contrasts  
# Oct 4 2023 We -- CDK4 ddPCR CNV  
#  
#  
# Eva Lukacova  
#
```

## CDKN2A

### EDA

Triplot (for FR by surgery and group)

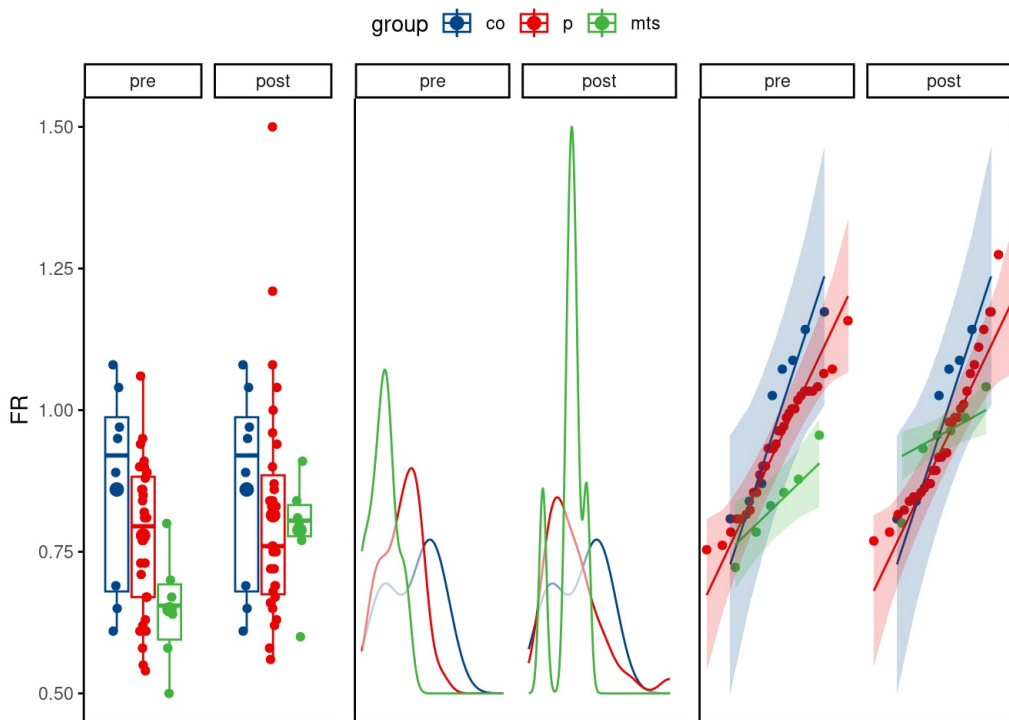

Spaghetti plot for surgery (w group wo co)

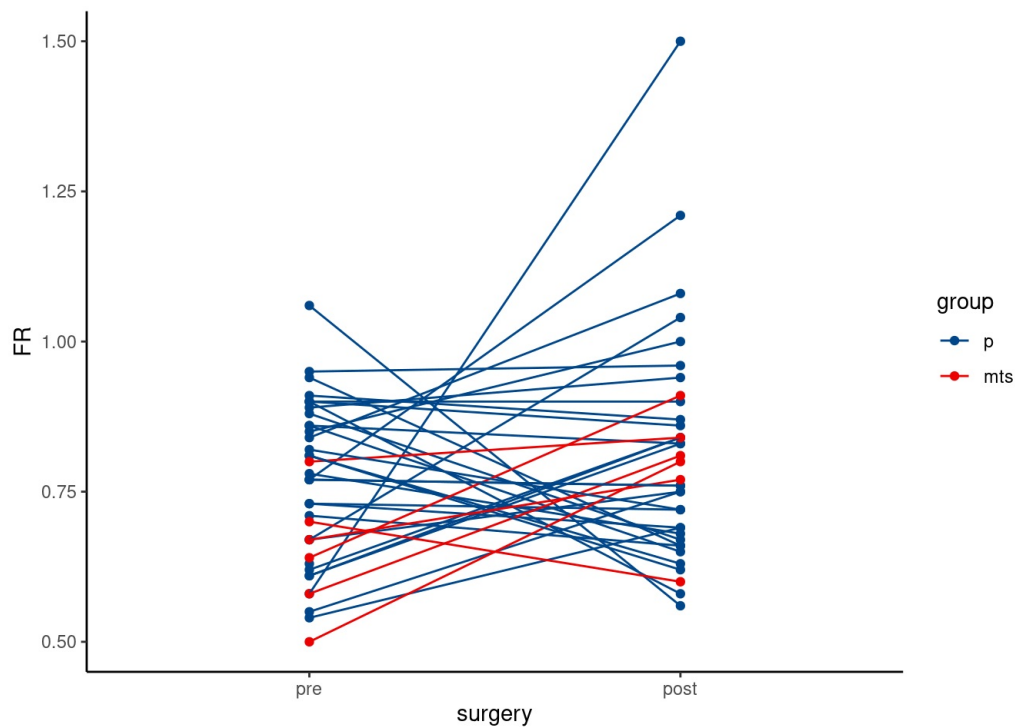

## Linear mixed model (to fit Repeated measures ANOVA)

### Model fit

| <i>Predictors</i>                  | <i>Estimates</i> | <b>FR</b>     |  | <i>p</i>         |
|------------------------------------|------------------|---------------|--|------------------|
|                                    |                  | <i>CI</i>     |  |                  |
| (Intercept)                        | 0.84             | 0.75 – 0.93   |  | <b>&lt;0.001</b> |
| group [p]                          | -0.06            | -0.16 – 0.03  |  | 0.183            |
| group [mts]                        | -0.14            | -0.27 – -0.01 |  | <b>0.031</b>     |
| surgery [post]                     | 0.04             | -0.02 – 0.11  |  | 0.203            |
| <b>Random Effects</b>              |                  |               |  |                  |
| $\sigma^2$                         | 0.03             |               |  |                  |
| $\tau_{00}$ id                     | 0.00             |               |  |                  |
| ICC                                | 0.05             |               |  |                  |
| $N_{id}$                           | 46               |               |  |                  |
| Observations                       | 91               |               |  |                  |
| Marginal $R^2$ / Conditional $R^2$ | 0.069 / 0.118    |               |  |                  |

### Diagnostics

## DHARMA residual

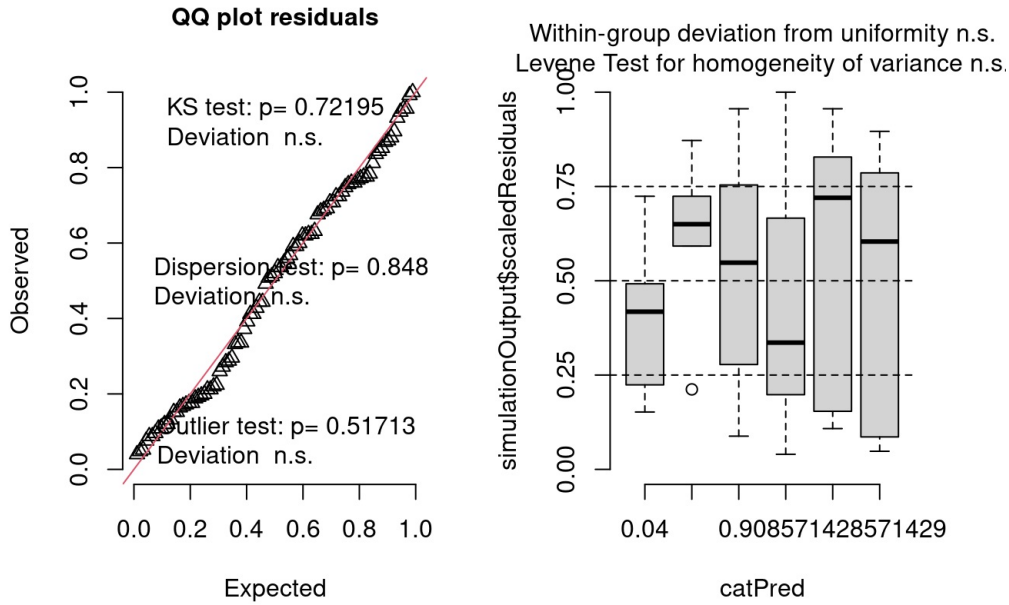

=> no outlier(s)

## Estimated marginal means

by group (w FDR correction of pvals)

| group | emmean | SE    | df    | lower.CL | upper.CL |
|-------|--------|-------|-------|----------|----------|
| co    | 0.860  | 0.042 | 42.28 | 0.775    | 0.945    |
| p     | 0.797  | 0.021 | 42.96 | 0.754    | 0.839    |
| mts   | 0.718  | 0.049 | 42.28 | 0.620    | 0.817    |

| contrast | estimate | SE    | df    | t.ratio | p.value | lowerCL | upperCL |
|----------|----------|-------|-------|---------|---------|---------|---------|
| co - p   | 0.063    | 0.047 | 42.41 | 1.343   | 0.186   | -0.054  | 0.181   |
| co - mts | 0.142    | 0.064 | 42.28 | 2.198   | 0.100   | -0.019  | 0.302   |
| p - mts  | 0.078    | 0.053 | 42.39 | 1.472   | 0.186   | -0.054  | 0.211   |

by surgery

| surgery | emmean | SE    | df    | lower.CL | upper.CL |
|---------|--------|-------|-------|----------|----------|
| pre     | 0.770  | 0.028 | 79.00 | 0.714    | 0.826    |
| post    | 0.813  | 0.028 | 79.13 | 0.757    | 0.869    |

| contrast   | estimate | SE    | df    | t.ratio | p.value | lowerCL | upperCL |
|------------|----------|-------|-------|---------|---------|---------|---------|
| pre - post | -0.043   | 0.034 | 44.71 | -1.282  | 0.206   | -0.111  | 0.025   |

## Marginal means plot

group

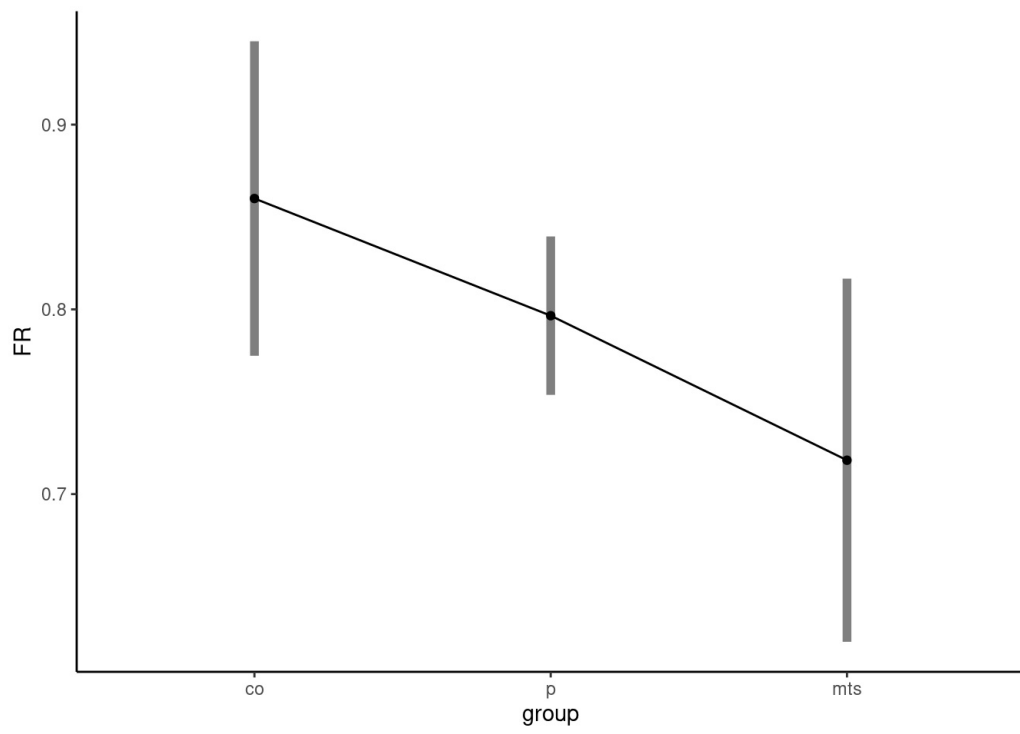

surgery

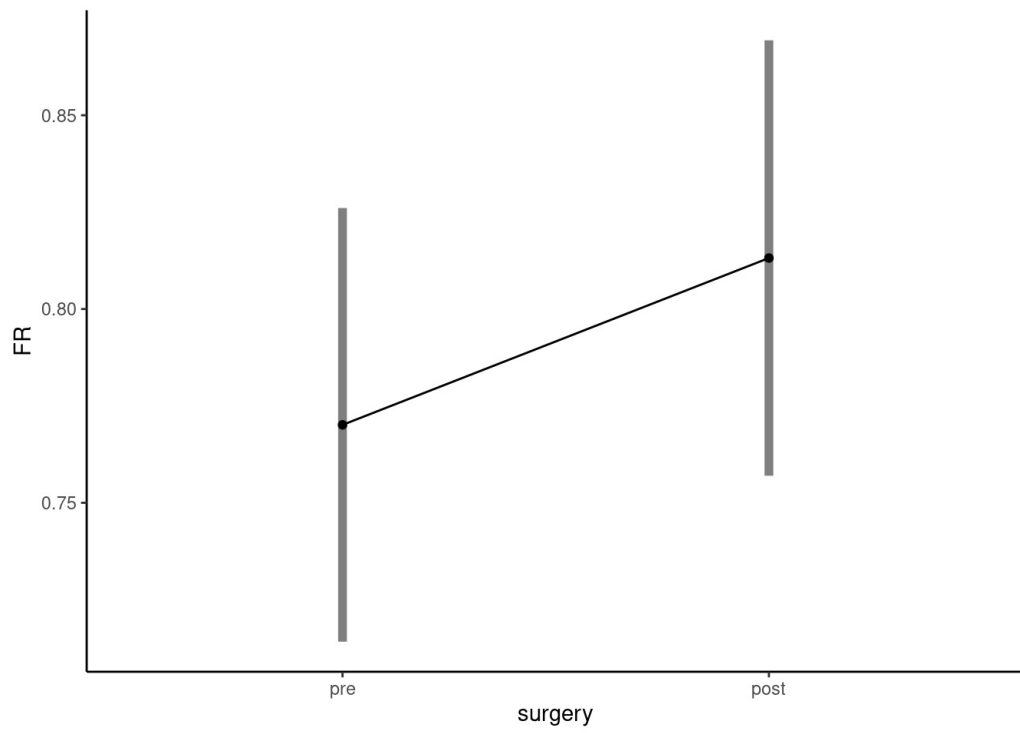

Empirical ROC

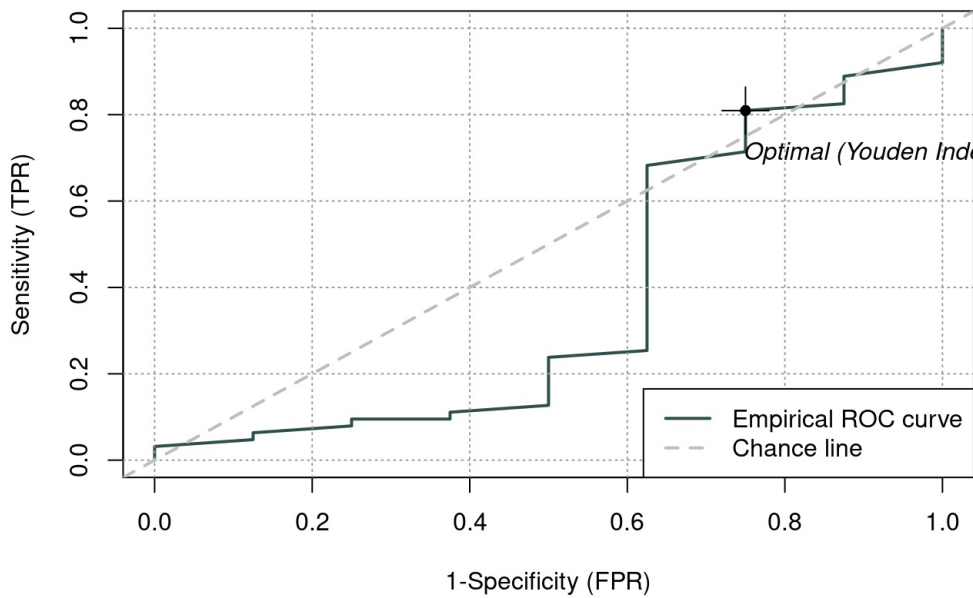

png  
2

## Youden index and cutoff

| value   | FPR     | TPR     | cutoff  |
|---------|---------|---------|---------|
| 0.05952 | 0.75000 | 0.80952 | 0.66000 |

## 95% ci for empirical ROC

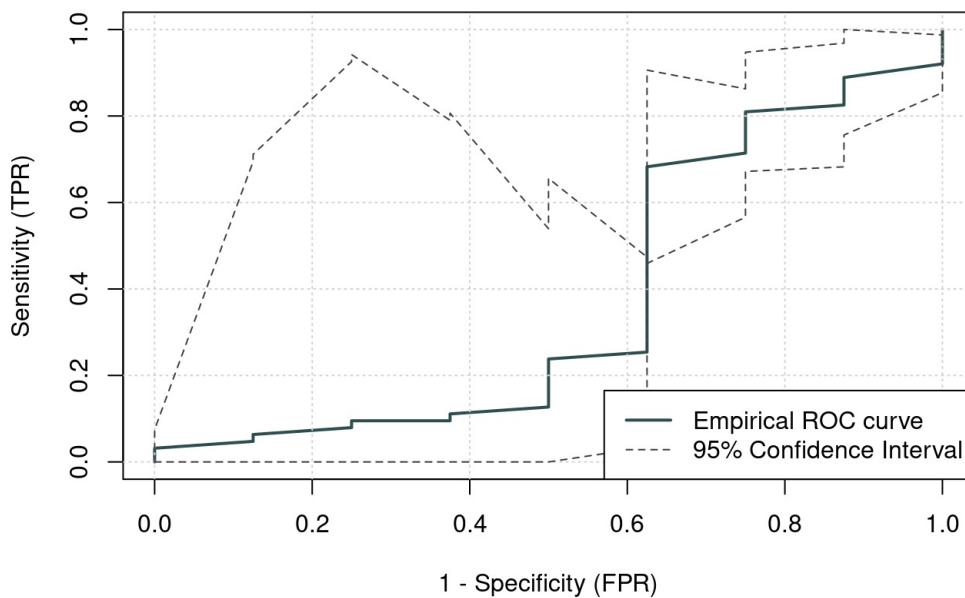

png  
2

## Session info

---

```
-- Session info
setting value
version R version 4.0.5 (2021-03-31)
os      CentOS Stream 8
system  x86_64, linux-gnu
ui      X11
language (EN)
collate en_US.UTF-8
ctype   en_US.UTF-8
tz      Europe/Bratislava
date    2023-10-09
pandoc  3.1.1 @ /usr/lib/rstudio/resources/app/bin/quarto/bin/tools/ (via rmarkdown)
```

---

```
-- Packages
package * version  date (UTC) lib source
DescTools * 0.99.41  2021-04-10 [1] CRAN (R 4.0.5)
DHARMA   * 0.4.6    2022-09-08 [1] CRAN (R 4.0.5)
dplyr    * 1.1.2    2023-04-20 [1] CRAN (R 4.0.5)
emmeans  * 1.7.5    2022-06-22 [1] CRAN (R 4.0.5)
ggplot2  * 3.4.2    2023-04-03 [1] CRAN (R 4.0.5)
ggpubr   * 0.4.0.999 2021-07-17 [1] Github (kassambara/ggpubr@ac5a01f)
ggsci    * 3.0.0    2023-03-08 [1] CRAN (R 4.0.5)
kableExtra * 1.3.4    2021-02-20 [1] CRAN (R 4.0.5)
lme4     * 1.1-34   2023-07-04 [1] CRAN (R 4.0.5)
Matrix   * 1.6-0    2023-07-08 [1] CRAN (R 4.0.5)
ROCit    * 2.1.1    2020-06-14 [1] CRAN (R 4.0.5)
sjPlot   * 2.8.12   2022-12-13 [1] Github (strengjacke/sjPlot@4058580)
```

```
[1] /home/mg/R/x86_64-pc-linux-gnu-library/4.0
```

```
[2] /opt/R/4.0.5/lib/R/library
```

---

# report\_CDKN2B\_\_Oct9\_2023.R

mg

2023-10-09

```
#  
#  
# Oct 9 2023 Mo -- CDKN2B  
# Oct 5 2023 Th -- triplot; spaghetti; lin mixed model - dg, outlier,  
#                   emmeans, custom contrasts  
# Oct 4 2023 We -- CDK4 ddPCR CNV  
#  
#  
# Eva Lukacova  
#
```

## CDKN2B

### EDA

Triplot (for FR by surgery and group)

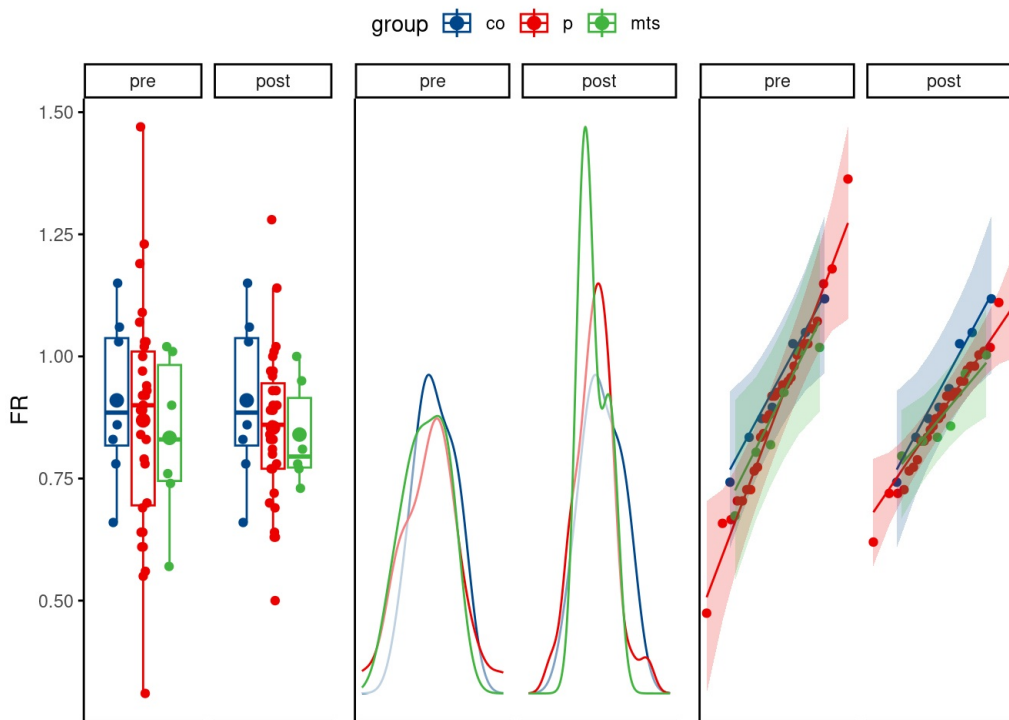

Spaghetti plot for surgery (w group wo co)

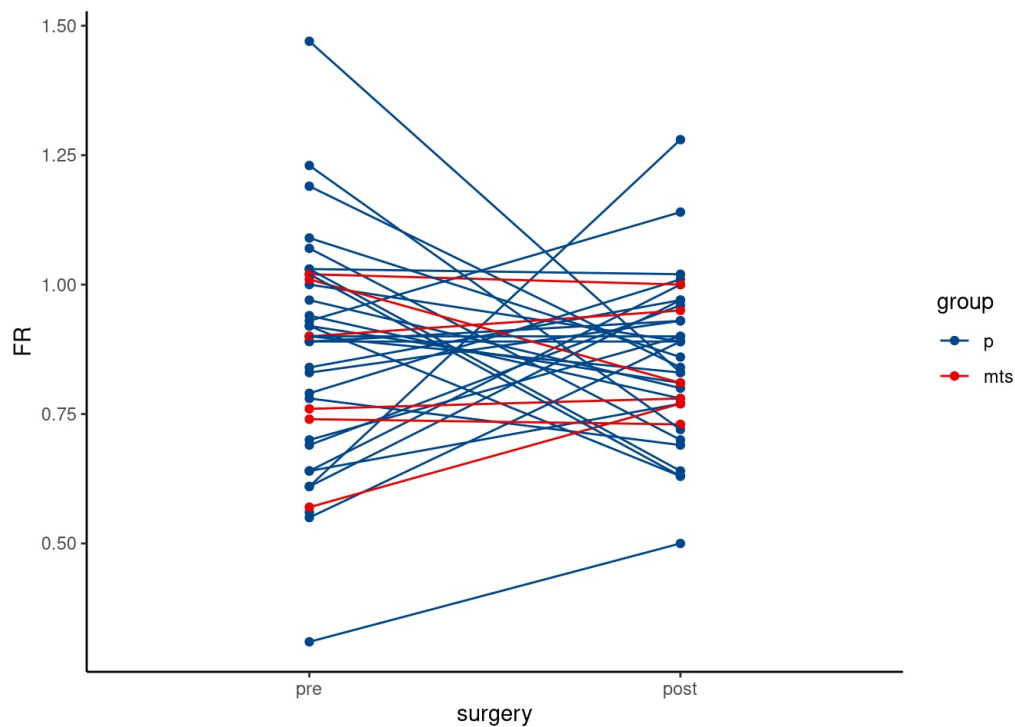

## Linear mixed model (to fit Repeated measures ANOVA)

### Model fit

| <i>Predictors</i>                  | <i>Estimates</i> | <b>FR</b>    |  | <i>p</i>         |
|------------------------------------|------------------|--------------|--|------------------|
|                                    |                  | <i>CI</i>    |  |                  |
| (Intercept)                        | 0.91             | 0.81 – 1.02  |  | <b>&lt;0.001</b> |
| group [p]                          | -0.05            | -0.16 – 0.06 |  | 0.373            |
| group [mts]                        | -0.07            | -0.22 – 0.07 |  | 0.328            |
| surgery [post]                     | -0.01            | -0.08 – 0.06 |  | 0.792            |
| <b>Random Effects</b>              |                  |              |  |                  |
| $\sigma^2$                         | 0.03             |              |  |                  |
| $\tau_{00}$ id                     | 0.00             |              |  |                  |
| ICC                                | 0.10             |              |  |                  |
| $N_{id}$                           | 46               |              |  |                  |
| Observations                       | 90               |              |  |                  |
| Marginal $R^2$ / Conditional $R^2$ | 0.014 / 0.115    |              |  |                  |

### Diagnostics



## DHARMA residual

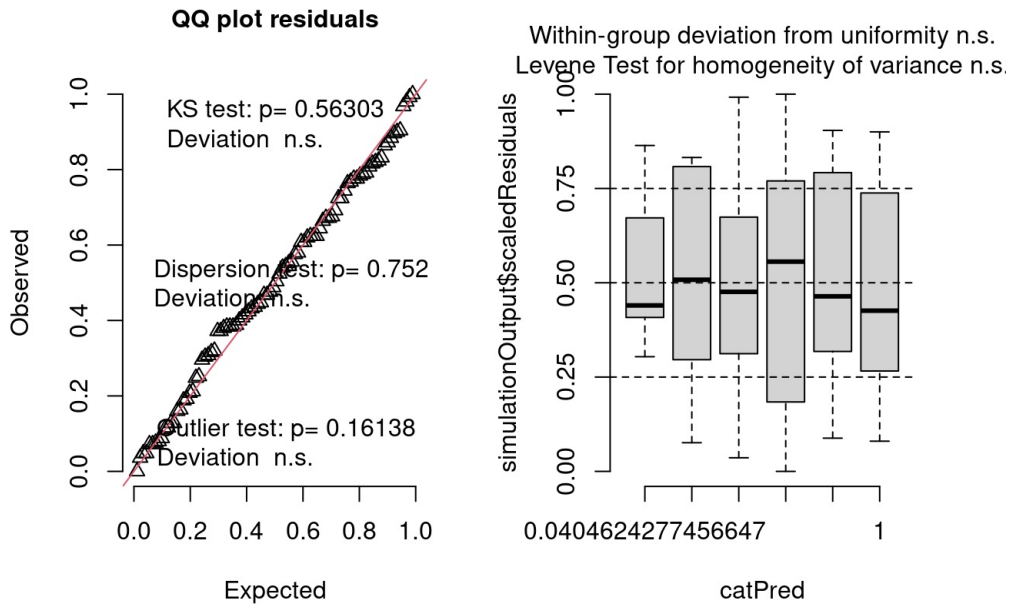

=> no outlier(s)

## Estimated marginal means

by group (w FDR correction of pvals)

| group | emmean | SE    | df    | lower.CL | upper.CL |
|-------|--------|-------|-------|----------|----------|
| co    | 0.910  | 0.049 | 41.61 | 0.811    | 1.009    |
| p     | 0.861  | 0.025 | 42.97 | 0.811    | 0.911    |
| mts   | 0.837  | 0.056 | 41.61 | 0.723    | 0.950    |

| contrast | estimate | SE    | df    | t.ratio | p.value | lowerCL | upperCL |
|----------|----------|-------|-------|---------|---------|---------|---------|
| co - p   | 0.049    | 0.055 | 41.88 | 0.896   | 0.563   | -0.087  | 0.186   |
| co - mts | 0.073    | 0.075 | 41.61 | 0.983   | 0.563   | -0.113  | 0.259   |
| p - mts  | 0.024    | 0.062 | 41.82 | 0.395   | 0.695   | -0.129  | 0.178   |

by surgery

| surgery | emmean | SE    | df    | lower.CL | upper.CL |
|---------|--------|-------|-------|----------|----------|
| pre     | 0.874  | 0.032 | 76.17 | 0.81     | 0.938    |
| post    | 0.864  | 0.032 | 76.17 | 0.80     | 0.928    |

| contrast   | estimate | SE    | df    | t.ratio | p.value | lowerCL | upperCL |
|------------|----------|-------|-------|---------|---------|---------|---------|
| pre - post | 0.01     | 0.037 | 44.37 | 0.264   | 0.793   | -0.065  | 0.085   |

## Marginal means plot

group

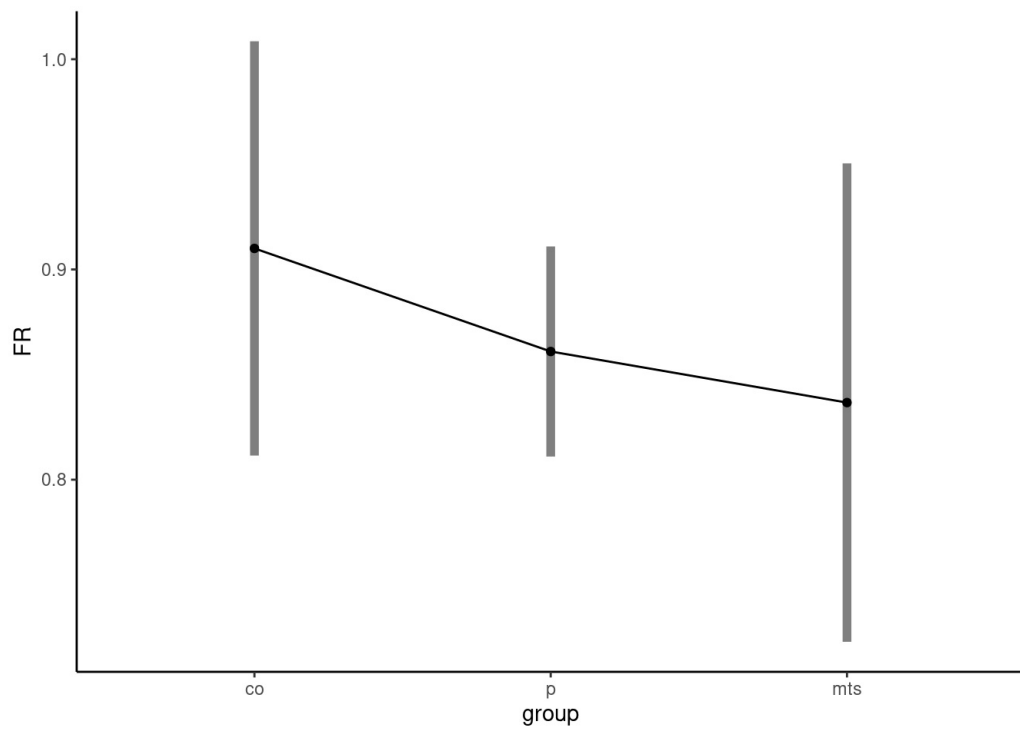

surgery

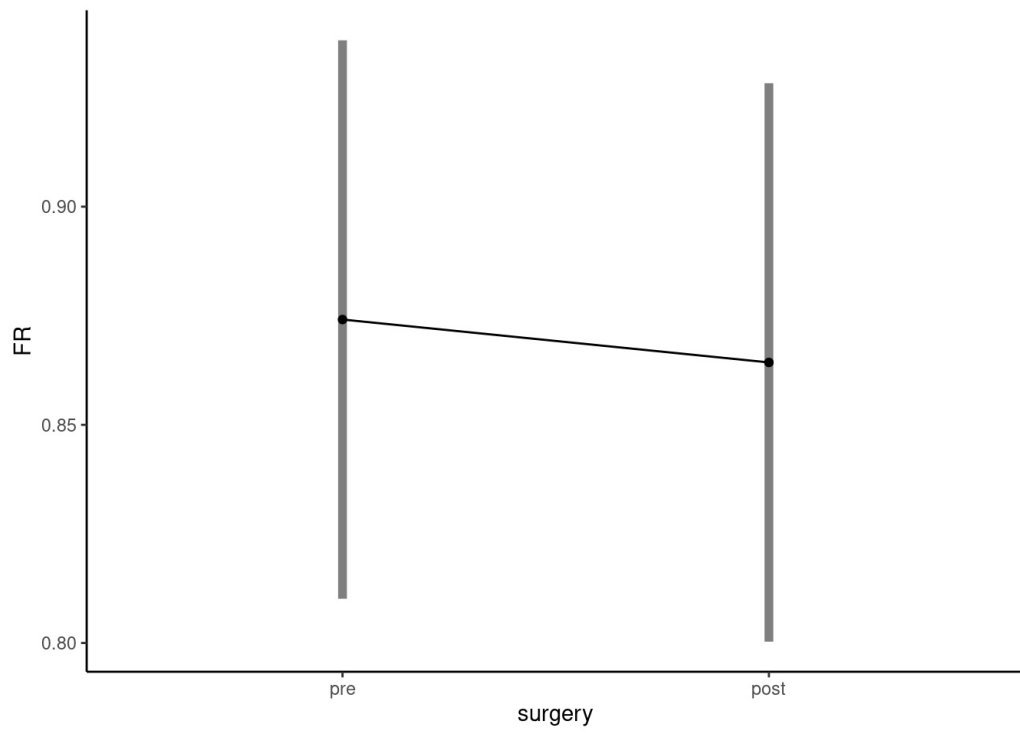

Empirical ROC

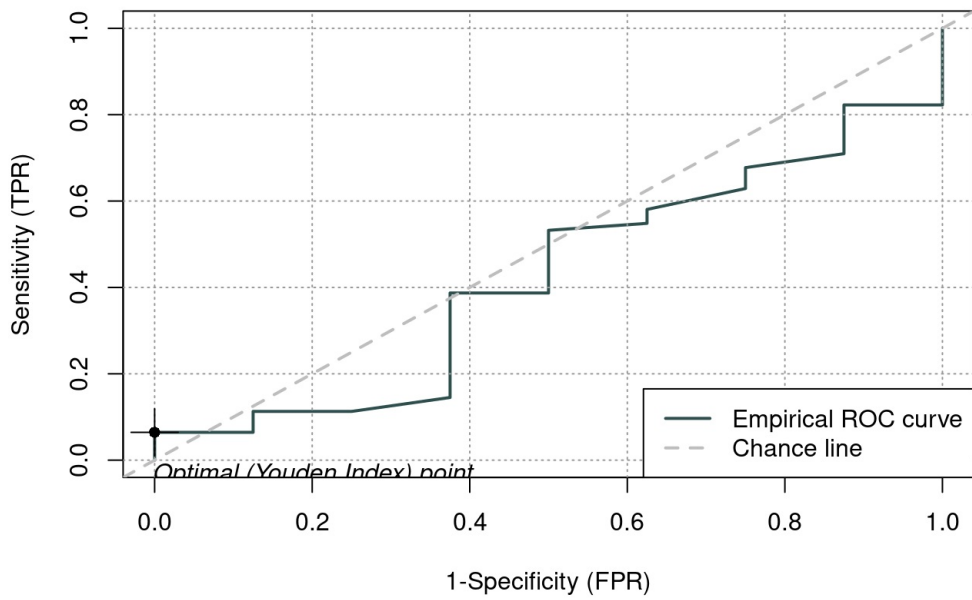

png  
2

### Youden index and cutoff

| value   | FPR     | TPR     | cutoff  |
|---------|---------|---------|---------|
| 0.06452 | 0.00000 | 0.06452 | 1.19000 |

### 95% ci for empirical ROC

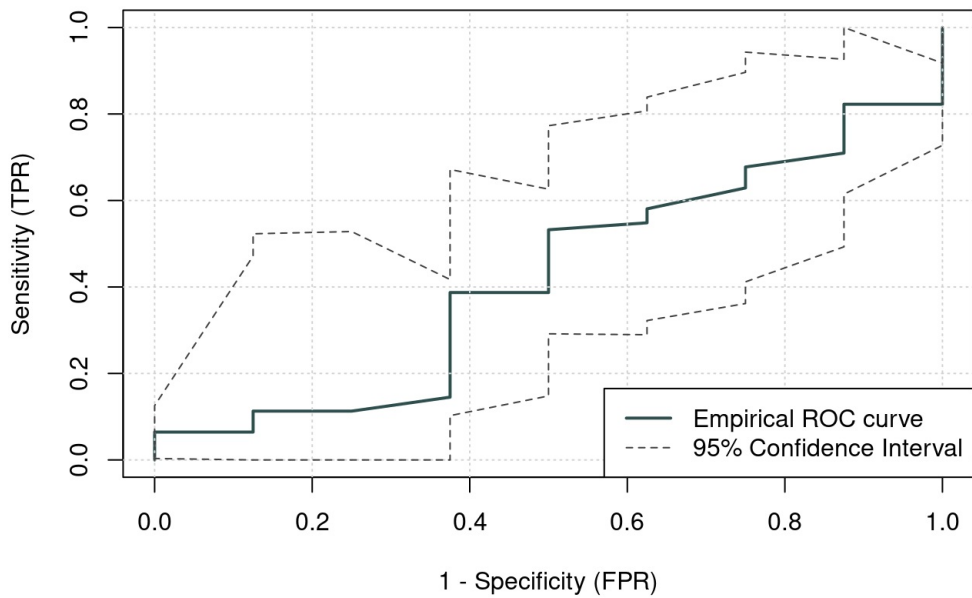

png  
2

### Session info

---

```
-- Session info
setting value
version R version 4.0.5 (2021-03-31)
os      CentOS Stream 8
system  x86_64, linux-gnu
ui      X11
language (EN)
collate en_US.UTF-8
ctype   en_US.UTF-8
tz      Europe/Bratislava
date    2023-10-09
pandoc  3.1.1 @ /usr/lib/rstudio/resources/app/bin/quarto/bin/tools/ (via rmarkdown)
```

---

```
-- Packages
package * version  date (UTC) lib source
DescTools * 0.99.41  2021-04-10 [1] CRAN (R 4.0.5)
DHARMA   * 0.4.6    2022-09-08 [1] CRAN (R 4.0.5)
dplyr    * 1.1.2    2023-04-20 [1] CRAN (R 4.0.5)
emmeans  * 1.7.5    2022-06-22 [1] CRAN (R 4.0.5)
ggplot2  * 3.4.2    2023-04-03 [1] CRAN (R 4.0.5)
ggpubr   * 0.4.0.999 2021-07-17 [1] Github (kassambara/ggpubr@ac5a01f)
ggsci    * 3.0.0    2023-03-08 [1] CRAN (R 4.0.5)
kableExtra * 1.3.4    2021-02-20 [1] CRAN (R 4.0.5)
lme4     * 1.1-34   2023-07-04 [1] CRAN (R 4.0.5)
Matrix   * 1.6-0    2023-07-08 [1] CRAN (R 4.0.5)
ROCit    * 2.1.1    2020-06-14 [1] CRAN (R 4.0.5)
sjPlot   * 2.8.12   2022-12-13 [1] Github (strengjacke/sjPlot@4058580)
```

```
[1] /home/mg/R/x86_64-pc-linux-gnu-library/4.0
```

```
[2] /opt/R/4.0.5/lib/R/library
```

---

# report\_CDK4\_\_Oct9\_2023.R

mg

2023-10-09

```
#  
#  
# Oct 9 2023 Mo -- saving figs; txt  
# Oct 5 2023 Th -- triplot; spaghetti; lin mixed model - dg, outlier,  
#                   emmeans, custom contrasts  
# Oct 4 2023 We -- CDK4 ddPCR CNV  
#  
#  
# Eva Lukacova  
#
```

## CDK4

### EDA

Triplot (for FR by surgery and group)

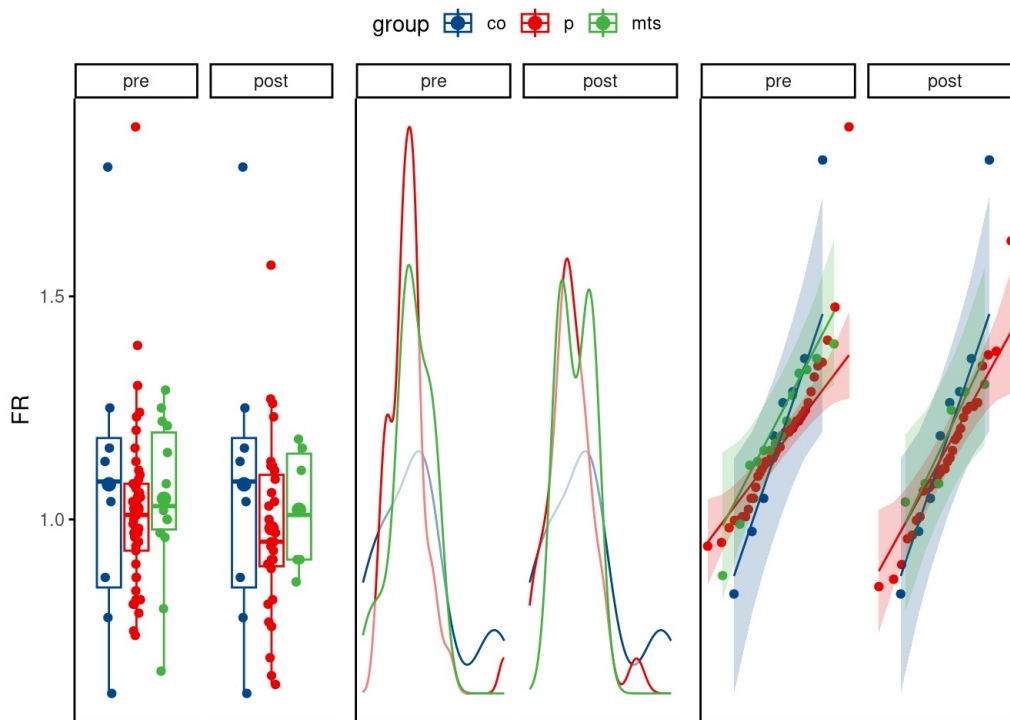

Spaghetti plot for surgery (w group wo co)

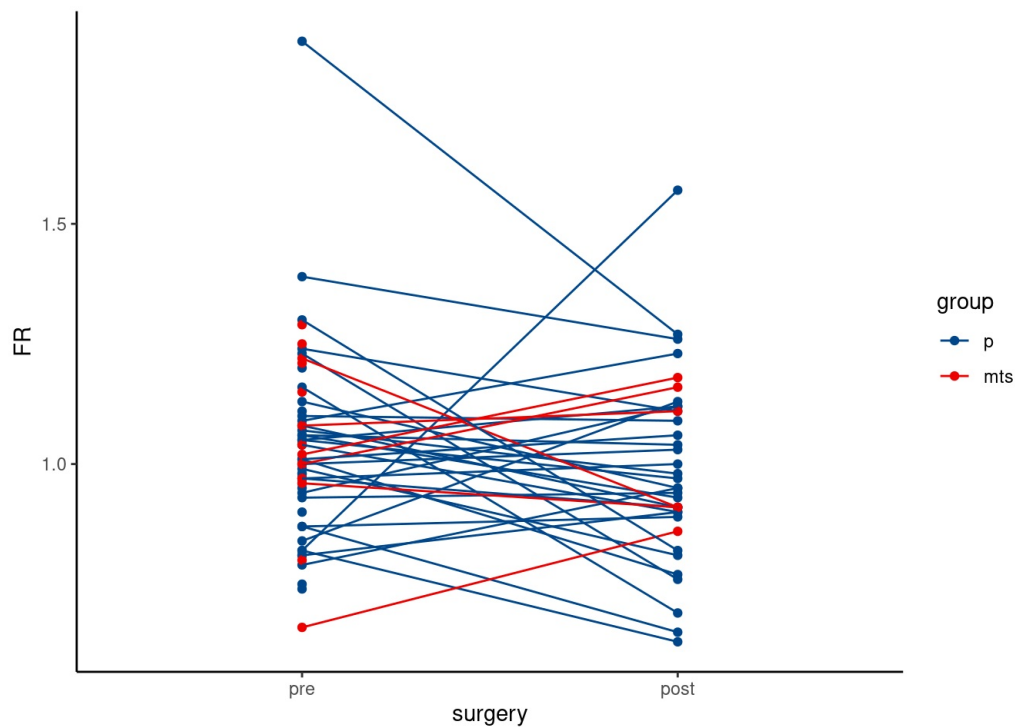

## Linear mixed model (to fit Repeated measures ANOVA)

### Model fit

| <i>Predictors</i>                  | <i>Estimates</i> | <b>FR</b>    |  | <i>p</i>         |
|------------------------------------|------------------|--------------|--|------------------|
|                                    |                  | <i>CI</i>    |  |                  |
| (Intercept)                        | 1.10             | 0.96 – 1.23  |  | <b>&lt;0.001</b> |
| group [p]                          | -0.08            | -0.22 – 0.06 |  | 0.266            |
| group [mts]                        | -0.04            | -0.21 – 0.13 |  | 0.631            |
| surgery [post]                     | -0.04            | -0.10 – 0.02 |  | 0.214            |
| <b>Random Effects</b>              |                  |              |  |                  |
| $\sigma^2$                         | 0.02             |              |  |                  |
| $\tau_{00}$ id                     | 0.02             |              |  |                  |
| ICC                                | 0.49             |              |  |                  |
| $N_{id}$                           | 67               |              |  |                  |
| Observations                       | 112              |              |  |                  |
| Marginal $R^2$ / Conditional $R^2$ | 0.025 / 0.506    |              |  |                  |

### Diagnostics

## DHARMa residual

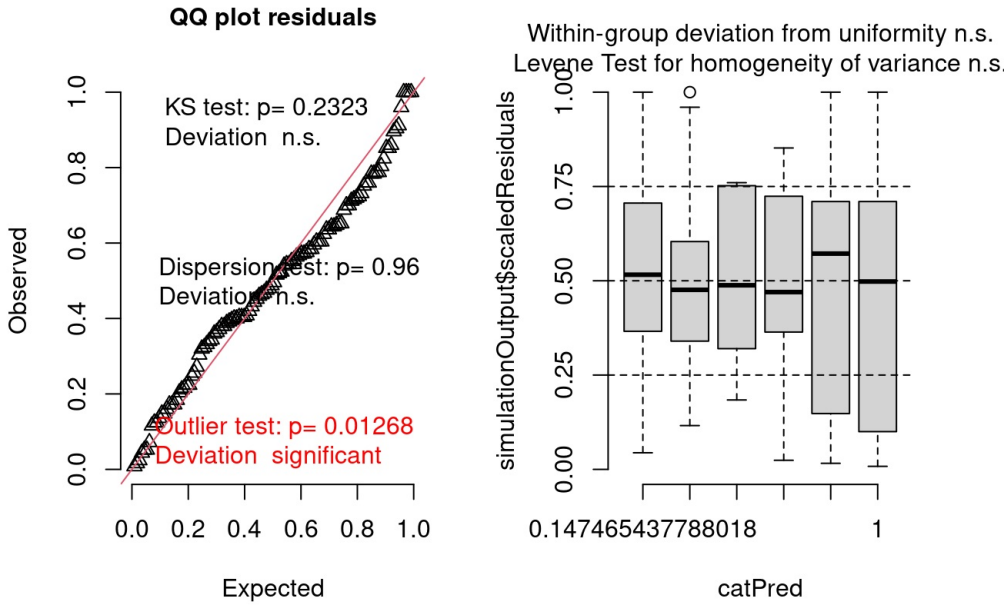

=> outlier(s)

one in co, one in p => search for them

p -> M7

co -> H5

=> remove them

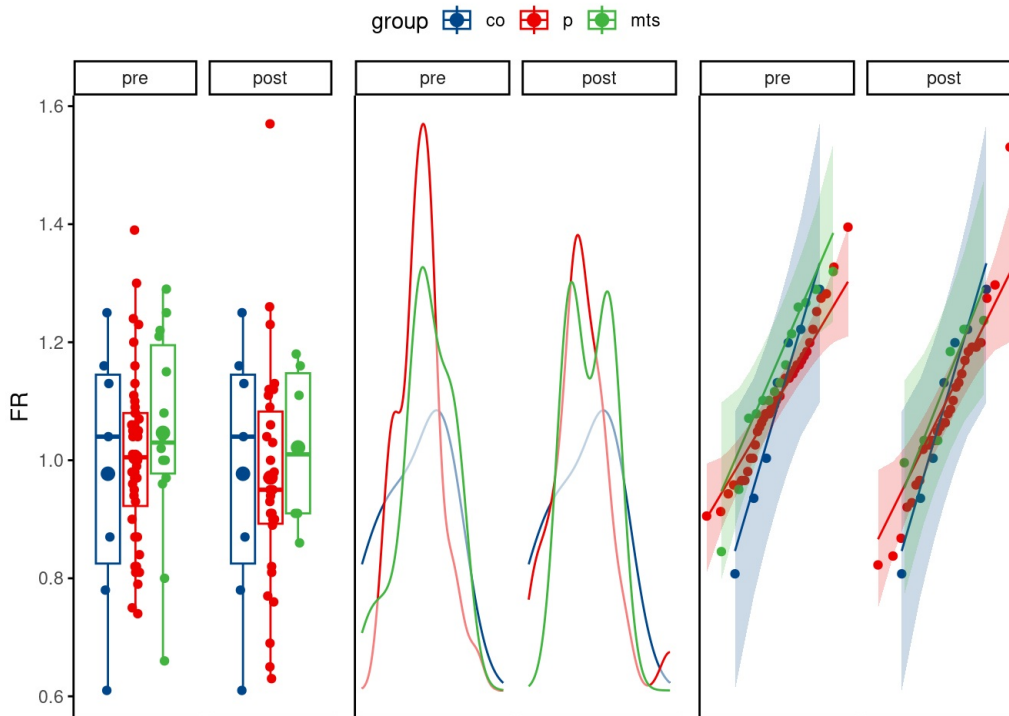

=> rerun wo outliers

## Model fit

| Predictors     | Estimates | FR           |        |
|----------------|-----------|--------------|--------|
|                |           | CI           | p      |
| (Intercept)    | 0.99      | 0.88 – 1.10  | <0.001 |
| group [p]      | 0.01      | -0.10 – 0.12 | 0.874  |
| group [mts]    | 0.06      | -0.07 – 0.19 | 0.374  |
| surgery [post] | -0.03     | -0.09 – 0.03 | 0.333  |

## Random Effects

|                                    |               |
|------------------------------------|---------------|
| $\sigma^2$                         | 0.02          |
| $\tau_{00 \text{ id}}$             | 0.01          |
| ICC                                | 0.29          |
| $N_{\text{id}}$                    | 65            |
| Observations                       | 108           |
| Marginal $R^2$ / Conditional $R^2$ | 0.023 / 0.309 |

## Diagnostics

DHARMA residual

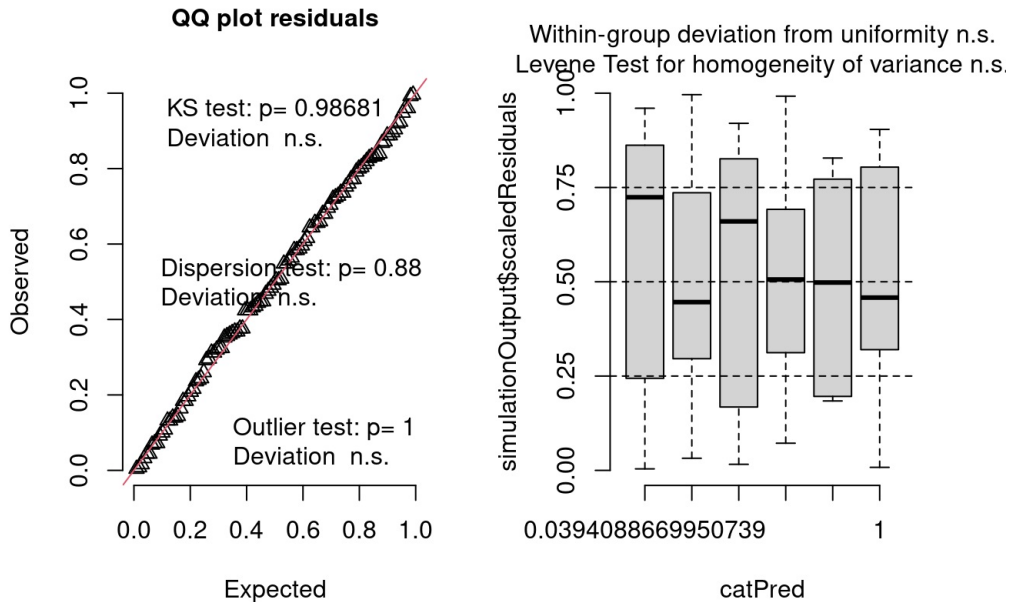

## Estimated marginal means

by group (w FDR correction of pvals)

| group | emmean | SE    | df    | lower.CL | upper.CL |
|-------|--------|-------|-------|----------|----------|
| co    | 0.977  | 0.053 | 48.88 | 0.871    | 1.083    |
| p     | 0.986  | 0.023 | 59.52 | 0.941    | 1.032    |
| mts   | 1.038  | 0.042 | 71.40 | 0.953    | 1.122    |

| contrast | estimate | SE    | df    | t.ratio | p.value | lowerCL | upperCL |
|----------|----------|-------|-------|---------|---------|---------|---------|
| co - p   | -0.009   | 0.057 | 50.40 | -0.159  | 0.874   | -0.151  | 0.133   |
| co - mts | -0.060   | 0.068 | 56.85 | -0.892  | 0.564   | -0.227  | 0.107   |
| p - mts  | -0.051   | 0.048 | 67.74 | -1.077  | 0.564   | -0.168  | 0.066   |

by surgery

| surgery | emmean | SE    | df    | lower.CL | upper.CL |
|---------|--------|-------|-------|----------|----------|
| pre     | 1.015  | 0.026 | 82.95 | 0.963    | 1.067    |
| post    | 0.986  | 0.030 | 96.69 | 0.926    | 1.045    |

| contrast   | estimate | SE   | df    | t.ratio | p.value | lowerCL | upperCL |
|------------|----------|------|-------|---------|---------|---------|---------|
| pre - post | 0.029    | 0.03 | 53.06 | 0.968   | 0.337   | -0.031  | 0.089   |



# Marginal means plot

group

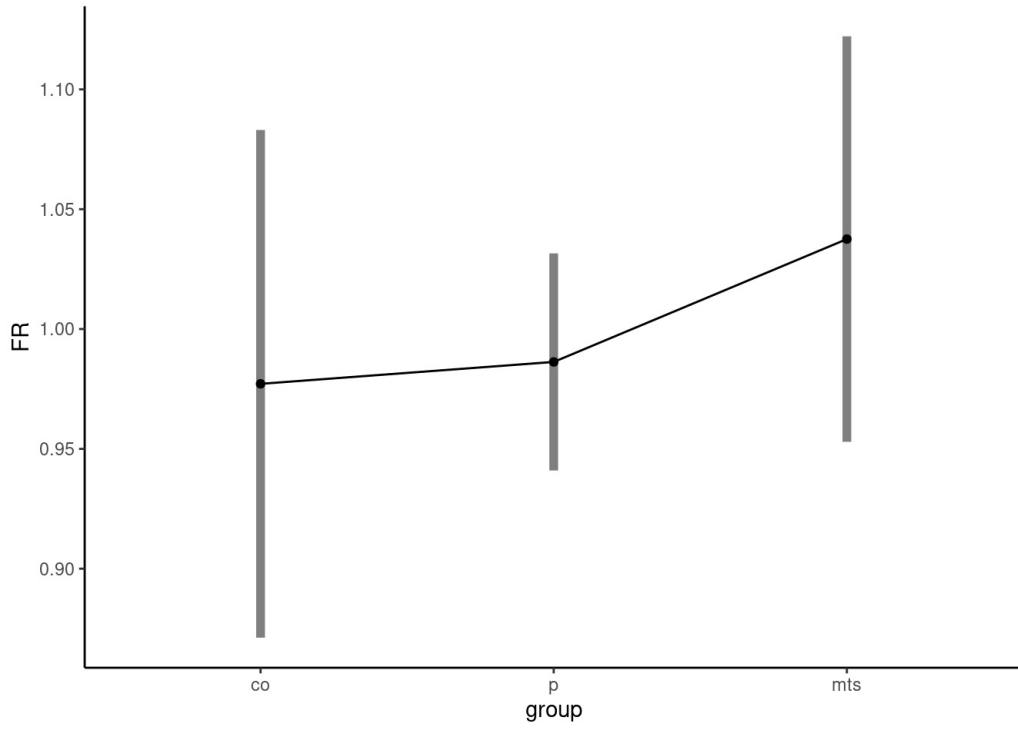

surgery

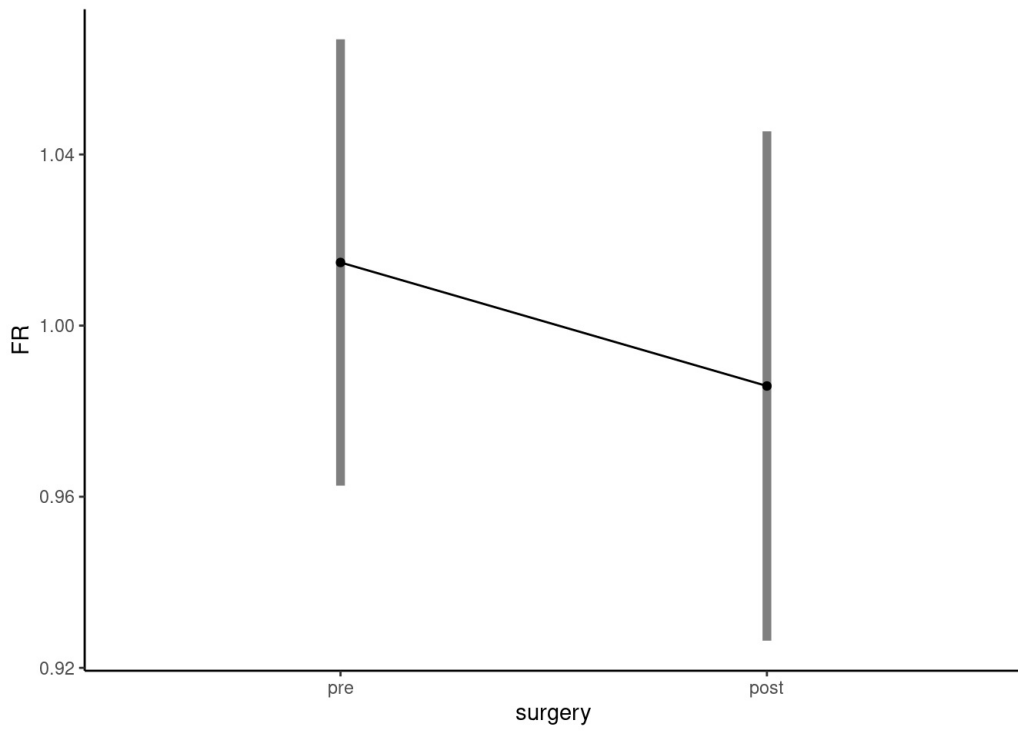

# Empirical ROC

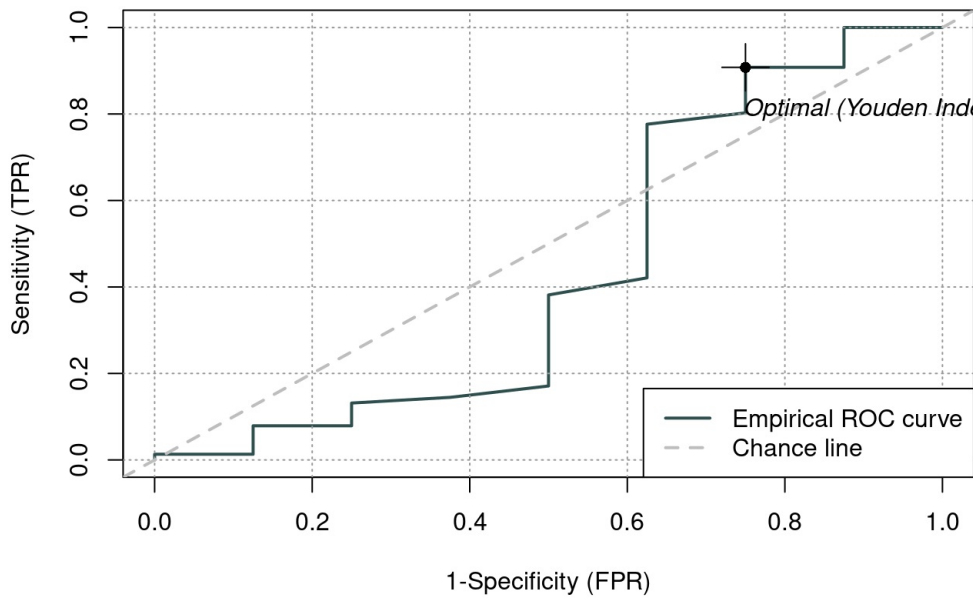

png  
2

### Youden index and cutoff

| value  | FPR    | TPR    | cutoff |
|--------|--------|--------|--------|
| 0.1579 | 0.7500 | 0.9079 | 0.7900 |

### 95% ci for empirical ROC

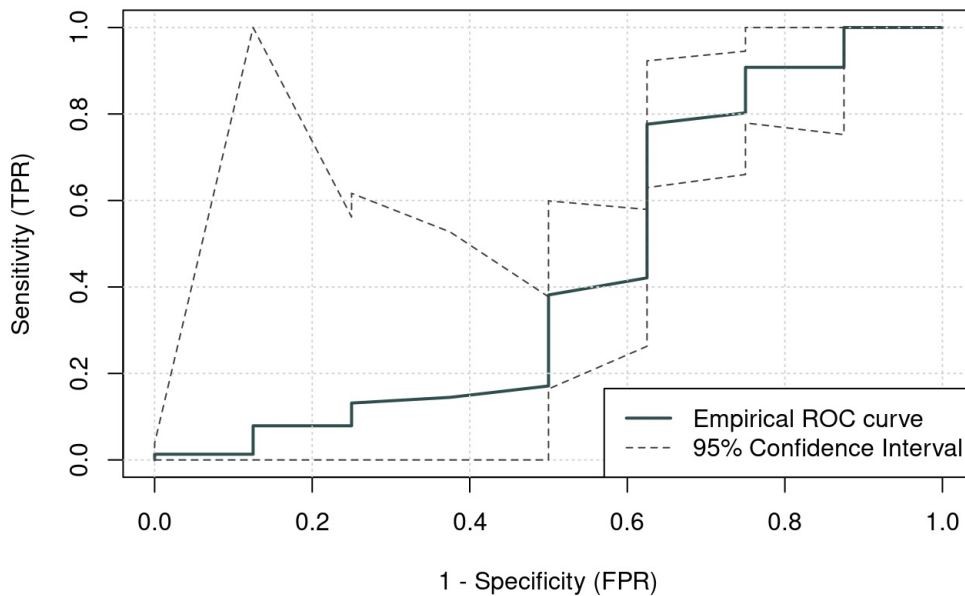

png  
2

## Data analysis

Data were explored and analyzed in R [1], ver. 4.0.5, with the aid of libraries listed below at Session info.

Distribution of the Final Ratio (FR) was visualized by boxplot overlaid with swarmplot, density plot and Quantile-Quantile plot with the 95% confidence band constructed by bootstrap. Change of FR between pre- and post-surgery stages was visualized by the spaghetti plot.

Linear mixed model of the form  $Fr \sim \text{group} + \text{surgery} + (1|id)$  was fitted to the data by REML method. There, group was a factor with three levels: control, primary, metastasis and surgery was a factor with two levels: pre, post. The fitted model was subjected to diagnostic analysis of residuals. If outliers were detected (two outlier for CDK4, none for CDKN2A and CDKN2B) then they were excluded from considerations and the model was refit and subjected to diagnostics. Effect size was quantified by the Adjusted  $R^2$ .

The fitted linear mixed model was used to estimate the marginal means. Post-hoc pairwise comparisons were performed with the Benjamini-Hochberg correction of p-values in the case of the comparisons for group factor. The marginal means together with their 95% confidence interval were visualized by the marginal means plot.

[1] R Core Team (2021). R: A language and environment for statistical computing. R Foundation for Statistical Computing, Vienna, Austria. URL <https://www.R-project.org/> (<https://www.R-project.org/>).

## Session info

```
— Session info —————
setting value
version R version 4.0.5 (2021-03-31)
os CentOS Stream 8
system x86_64, linux-gnu
ui X11
language (EN)
collate en_US.UTF-8
ctype en_US.UTF-8
tz Europe/Bratislava
date 2023-10-09
pandoc 3.1.1 @ /usr/lib/rstudio/resources/app/bin/quarto/bin/tools/ (via rmarkdown)

— Packages —————
package * version date (UTC) lib source
DescTools * 0.99.41 2021-04-10 [1] CRAN (R 4.0.5)
DHARMA * 0.4.6 2022-09-08 [1] CRAN (R 4.0.5)
dplyr * 1.1.2 2023-04-20 [1] CRAN (R 4.0.5)
emmeans * 1.7.5 2022-06-22 [1] CRAN (R 4.0.5)
ggplot2 * 3.4.2 2023-04-03 [1] CRAN (R 4.0.5)
ggpubr * 0.4.0.999 2021-07-17 [1] Github (kassambara/ggpubr@ac5a01f)
ggsci * 3.0.0 2023-03-08 [1] CRAN (R 4.0.5)
kableExtra * 1.3.4 2021-02-20 [1] CRAN (R 4.0.5)
lme4 * 1.1-34 2023-07-04 [1] CRAN (R 4.0.5)
Matrix * 1.6-0 2023-07-08 [1] CRAN (R 4.0.5)
ROCit * 2.1.1 2020-06-14 [1] CRAN (R 4.0.5)
sjPlot * 2.8.12 2022-12-13 [1] Github (strengjacke/sjPlot@4058580)

[1] /home/mg/R/x86_64-pc-linux-gnu-library/4.0
[2] /opt/R/4.0.5/lib/R/library
```
